# Supplementary material for: In Vitro Digestion and Intestinal Absorption of Mycotoxins Due to Exposure from Breakfast Cereals: Implications for Children’s Health
Source: MDPI journal article supplement (doi:10.3390/toxins16050205), 2024-04-25
Supplement: s1 [file s1]

# Supplementary Materials: In Vitro Digestion and Intestinal Absorption of Mycotoxins Due to Exposure from Breakfast Cereals: Implications for Children's Health

**Table S1.** Regression equations, coefficients of correlation ( $r$ ) for the mycotoxins under study in bioaccessible fractions.

|                   | <b>Mycotoxin</b> | <b>Matrix</b> | <b><math>m</math></b> | <b><math>b</math></b> | <b><math>r</math></b> | <b>LOD<br/>(<math>\mu\text{g/L}</math>)</b> | <b>LOQ<br/>(<math>\mu\text{g/L}</math>)</b> |
|-------------------|------------------|---------------|-----------------------|-----------------------|-----------------------|---------------------------------------------|---------------------------------------------|
| <b>Gastric</b>    | <b>AFB1</b>      | C             | -                     | -                     | -                     | -                                           | -                                           |
|                   |                  | CSSM          | -                     | -                     | -                     | -                                           | -                                           |
|                   |                  | CSSMLF        | -                     | -                     | -                     | -                                           | -                                           |
|                   |                  | CSB           | -                     | -                     | -                     | -                                           | -                                           |
|                   | <b>ENNB</b>      | C             | 0.4169                | 6.5665                | 0.9975                | 0.4                                         | 1.2                                         |
|                   |                  | CSSM          | 0.3291                | 3.6091                | 0.9977                | 0.3                                         | 1.1                                         |
|                   |                  | CSSMLF        | 0.8963                | -15.196               | 0.9910                | 0.7                                         | 2.3                                         |
|                   |                  | CSB           | 0.2494                | 7.3852                | 0.9834                | 0.9                                         | 3.1                                         |
|                   | <b>STG</b>       | C             | -                     | -                     | -                     | -                                           | -                                           |
|                   |                  | CSSM          | -                     | -                     | -                     | -                                           | -                                           |
|                   |                  | CSSMLF        | -                     | -                     | -                     | -                                           | -                                           |
|                   |                  | CSB           | -                     | -                     | -                     | -                                           | -                                           |
| <b>Intestinal</b> | <b>AFB1</b>      | C             | 0.0073                | -0.2087               | 0.9908                | 0.7                                         | 2.3                                         |
|                   |                  | CSSM          | 0.0035                | -0.0872               | 0.9889                | 0.8                                         | 2.5                                         |
|                   |                  | CSSMLF        | 0.0035                | -0.0717               | 0.9940                | 0.6                                         | 1.9                                         |
|                   |                  | CSB           | 0.0049                | -0.0147               | 0.9992                | 0.2                                         | 0.6                                         |
|                   | <b>ENNB</b>      | C             | 0.3690                | 0.2254                | 0.9987                | 0.3                                         | 0.8                                         |
|                   |                  | CSSM          | 0.4543                | 0.9663                | 0.9997                | 0.1                                         | 0.4                                         |
|                   |                  | CSSMLF        | 0.3797                | 11.611                | 0.9989                | 0.2                                         | 0.8                                         |
|                   |                  | CSB           | 0.3284                | 7.6747                | 0.9930                | 0.6                                         | 2.0                                         |
|                   | <b>STG</b>       | C             | 0.0709                | -1.491                | 0.9936                | 0.6                                         | 1.9                                         |
|                   |                  | CSSM          | 0.0257                | -0.0365               | 0.9975                | 0.4                                         | 1.2                                         |
|                   |                  | CSSMLF        | 0.0495                | -0.8554               | 0.9961                | 0.4                                         | 1.5                                         |
|                   |                  | CSB           | 0.0302                | 0.338                 | 0.9976                | 0.3                                         | 1.2                                         |

*Abbreviations:* C – Cereal; CSSM – Cereal with Semi-Skimmed Milk; CSSMLF – Cereal with Semi-Skimmed Milk Lactose Free; CSB – Cereal with Soy Beverage.

**Table S2.** Recoveries (%), repeatability and reproducibility (%CV), limits of detection (LOD) and quantification (LOQ) of the analytical method used to determine the mycotoxins under study in the bioaccessible fractions (gastric and intestinal) after *in vitro* digestion.

|        |           | Bioaccessible fractions |              |                     |                       |            |            |              |                     |                       |            |            |
|--------|-----------|-------------------------|--------------|---------------------|-----------------------|------------|------------|--------------|---------------------|-----------------------|------------|------------|
|        |           | Gastric                 |              |                     |                       |            |            | Intestinal   |                     |                       |            |            |
| Matrix | Mycotoxin | Spiked level (µg/L)     | Recovery (%) | Repeatability (%CV) | Reproducibility (%CV) | LOD (µg/L) | LOQ (µg/L) | Recovery (%) | Repeatability (%CV) | Reproducibility (%CV) | LOD (µg/L) | LOQ (µg/L) |
| C      | AFB1      | 25                      | -            | -                   | -                     | -          | -          | 102.6        | 6.78                | 3.0                   | 0.2        | 0.8        |
|        |           | 50                      | -            | -                   | -                     | -          | -          | 81.4         | 10.46               | 14.7                  |            |            |
|        |           | 200                     | -            | -                   | -                     | -          | -          | 74.1         | 8.31                | 6.8                   |            |            |
|        | ENNB      | 25                      | 97.4         | 5.73                | 14.6                  | 0.5        | 1.8        | 61.2         | 5.13                | 1.0                   | 0.5        | 1.7        |
|        |           | 50                      | 90.2         | 6.09                | 6.7                   |            |            | 82.5         | 9.57                | 14.4                  |            |            |
|        |           | 200                     | 72.4         | 3.44                | 5.3                   |            |            | 84.4         | 9.91                | 4.4                   |            |            |
|        | STG       | 25                      | -            | -                   | -                     | -          | -          | 80.3         | 5.94                | 7.3                   | 0.6        | 1.9        |
|        |           | 50                      | -            | -                   | -                     | -          | -          | 101.6        | 4.8                 | 8.3                   |            |            |
|        |           | 200                     | -            | -                   | -                     | -          | -          | 115.3        | 11.51               | 1.2                   |            |            |
| CSSM   | AFB1      | 25                      | -            | -                   | -                     | -          | -          | 117.9        | 9.33                | 0.4                   | 0.5        | 1.8        |
|        |           | 50                      | -            | -                   | -                     | -          | -          | 94.4         | 12.97               | 9.2                   |            |            |
|        |           | 200                     | -            | -                   | -                     | -          | -          | 93.1         | 5.86                | 1.5                   |            |            |
|        | ENNB      | 25                      | 94.0         | 6.65                | 3.2                   | 0.6        | 2.0        | 102.9        | 8.8                 | 1.0                   | 0.3        | 1.0        |
|        |           | 50                      | 83.4         | 11.0                | 3.8                   |            |            | 89.9         | 5.51                | 7.6                   |            |            |
|        |           | 200                     | 67.8         | 7.5                 | 7.2                   |            |            | 58.2         | 8.1                 | 0.2                   |            |            |
|        | STG       | 25                      | -            | -                   | -                     | -          | -          | 104.3        | 7.99                | 4.5                   | 0.2        | 0.8        |
|        |           | 50                      | -            | -                   | -                     | -          | -          | 94.6         | 9.6                 | 12.4                  |            |            |
|        |           | 200                     | -            | -                   | -                     | -          | -          | 71.3         | 8.0                 | 10.2                  |            |            |
| CSSMLF | AFB1      | 25                      | -            | -                   | -                     | -          | -          | 113.2        | 7.9                 | 3.4                   | 0.1        | 0.4        |
|        |           | 50                      | -            | -                   | -                     | -          | -          | 93.2         | 5.81                | 1.0                   |            |            |
|        |           | 200                     | -            | -                   | -                     | -          | -          | 99.4         | 12.0                | 0.9                   |            |            |
|        | ENNB      | 25                      | 105.6        | 8.64                | 2.5                   | 0.6        | 2.1        | 110.3        | 8.31                | 10.2                  | 0.1        | 0.4        |
|        |           | 50                      | 117.8        | 6.36                | 0.5                   |            |            | 91.1         | 7.9                 | 15.3                  |            |            |
|        |           | 200                     | 97.0         | 7.51                | 13.2                  |            |            | 72.2         | 9.84                | 8.5                   |            |            |
|        | STG       | 25                      | -            | -                   | -                     | -          | -          | 55.0         | 6.1                 | 0.1                   | 0.5        | 1.8        |
|        |           | 50                      | -            | -                   | -                     | -          | -          | 63.8         | 9.68                | 0.8                   |            |            |
|        |           | 200                     | -            | -                   | -                     | -          | -          | 68.2         | 14.2                | 11.7                  |            |            |
| CSB    | AFB1      | 25                      | -            | -                   | -                     | -          | -          | 117.9        | 8.6                 | 0.9                   | 0.3        | 1.0        |
|        |           | 50                      | -            | -                   | -                     | -          | -          | 87.2         | 3.53                | 11.4                  |            |            |
|        |           | 200                     | -            | -                   | -                     | -          | -          | 55.5         | 7.68                | 8.1                   |            |            |
|        | ENNB      | 25                      | 100.1        | 10.9                | 3.0                   | 0.4        | 1.3        | 99.5         | 10.5                | 11.5                  | 0.7        | 2.4        |
|        |           | 50                      | 97.2         | 8.0                 | 5.3                   |            |            | 110.1        | 6.75                | 12.8                  |            |            |
|        |           | 200                     | 81.0         | 9.7                 | 4.2                   |            |            | 56.2         | 6.91                | 3.8                   |            |            |
|        | STG       | 25                      | -            | -                   | -                     | -          | -          | 108.7        | 6.61                | 12.1                  | 0.5        | 1.6        |
|        |           | 50                      | -            | -                   | -                     | -          | -          | 119.1        | 3.6                 | 0.3                   |            |            |
|        |           | 200                     | -            | -                   | -                     | -          | -          | 98.7         | 13.7                | 4.7                   |            |            |

**Table S3.** Regression equations, coefficients of correlation (*r*) for the mycotoxins under study in transport assay.

| <b>Mycotoxin</b> | <b>Matrix</b> | <b><i>m</i></b> | <b><i>b</i></b> | <b><i>r</i></b> | <b>LOD<br/>(µg/L)</b> | <b>LOQ<br/>(µg/L)</b> |
|------------------|---------------|-----------------|-----------------|-----------------|-----------------------|-----------------------|
| <b>AFB1</b>      | C             | 0.0019          | -0.0222         | 0.9899          | 0.4                   | 1.2                   |
|                  | CSSM          | 0.0025          | -0.0079         | 0.9966          | 0.2                   | 0.7                   |
| <b>ENNБ</b>      | C             | 0.224           | 0.3777          | 0.9976          | 0.2                   | 0.6                   |
|                  | CSSM          | 0.1751          | 0.4629          | 0.9997          | 0.1                   | 0.2                   |
| <b>STG</b>       | C             | 0.0227          | -0.3864         | 0.9842          | 0.5                   | 1.5                   |
|                  | CSSM          | 0.0021          | -0.0164         | 0.9951          | 0.2                   | 0.8                   |
